# Supplementary material
Source: PubMed Central journal article supplement (PMC6953626)

**Obesity in the United States and economic intervention options: A study linking ecological epidemiology and system dynamics modeling**

Hsin-Jen Chen, PhD; Hong Xue, PhD; Shiyong Liu, PhD; Terry TK Huang, PhD; Y Claire Wang, ScD; Youfa Wang, MD, PhD

**Table S1.** The flow rates of transition across body weight and socioeconomic status (SES) among the US adults: Medical Expenditure Panel Survey (MEPS) 2001-2010<sup>^</sup>

| Transition*:                      | Year    |         |         |         |         |         |         |         |         |         | Average rate** |
|-----------------------------------|---------|---------|---------|---------|---------|---------|---------|---------|---------|---------|----------------|
|                                   | 2001-02 | 2002-03 | 2003-04 | 2004-05 | 2005-06 | 2006-07 | 2007-08 | 2008-09 | 2009-10 | 2010-11 |                |
| Normal weight became overweight   | 15.4%   | 15.2%   | 14.4%   | 15.1%   | 15.6%   | 14.2%   | 15.1%   | 14.6%   | 15.6%   | 14.8%   | 15.0%          |
| Normal weight became obese        | 1.5%    | 0.9%    | 0.9%    | 0.8%    | 1.0%    | 1.2%    | 1.5%    | 1.4%    | 1.0%    | 1.3%    | 1.2%           |
| Overweight became normal weight   | 12.9%   | 12.8%   | 13.2%   | 13.1%   | 12.6%   | 13.1%   | 12.0%   | 12.7%   | 13.1%   | 13.4%   | 12.9%          |
| Overweight became obese           | 12.9%   | 13.0%   | 13.1%   | 12.3%   | 13.3%   | 12.9%   | 14.9%   | 12.7%   | 13.5%   | 13.8%   | 13.2%          |
| Obese became normal weight        | 1.6%    | 1.3%    | 1.2%    | 2.2%    | 1.5%    | 0.9%    | 0.8%    | 1.3%    | 1.8%    | 1.0%    | 1.4%           |
| Obese became overweight           | 15.0%   | 16.2%   | 14.0%   | 13.4%   | 12.8%   | 12.9%   | 16.0%   | 13.6%   | 15.3%   | 12.3%   | 14.2%          |
|                                   |         |         |         |         |         |         |         |         |         |         |                |
| Family income from low to middle  | 24.4%   | 22.0%   | 22.0%   | 24.5%   | 25.2%   | 24.9%   | 23.7%   | 21.2%   | 22.3%   | 19.5%   | 23.0%          |
| Family income from low to high    | 7.8%    | 5.3%    | 4.8%    | 5.9%    | 5.4%    | 5.6%    | 7.0%    | 6.0%    | 6.2%    | 6.1%    | 6.0%           |
| Family income from middle to low  | 18.5%   | 17.1%   | 16.2%   | 16.6%   | 15.5%   | 16.3%   | 19.6%   | 18.2%   | 18.7%   | 16.7%   | 17.3%          |
| Family income from middle to high | 22.0%   | 24.8%   | 24.3%   | 23.8%   | 27.3%   | 24.2%   | 27.2%   | 24.4%   | 24.6%   | 22.8%   | 24.5%          |
| Family income from high to low    | 4.2%    | 3.8%    | 3.4%    | 2.7%    | 3.3%    | 3.6%    | 3.9%    | 4.7%    | 4.1%    | 3.1%    | 3.7%           |
| Family income from high to middle | 14.6%   | 14.7%   | 16.3%   | 13.5%   | 14.8%   | 13.8%   | 16.2%   | 15.1%   | 15.9%   | 14.7%   | 14.9%          |
|                                   |         |         |         |         |         |         |         |         |         |         |                |
| Employed to unemployed            | 1.0%    | 1.0%    | 1.3%    | 0.9%    | 1.0%    | 1.1%    | 1.1%    | 1.7%    | 1.4%    | 1.4%    | 1.2%           |
| Employed to not in labor force    | 0.3%    | 0.3%    | 0.4%    | 0.2%    | 0.3%    | 0.2%    | 0.3%    | 0.4%    | 0.3%    | 0.3%    | 0.3%           |
| Unemployed to employed            | 8.5%    | 8.6%    | 9.4%    | 7.8%    | 8.9%    | 8.8%    | 7.5%    | 8.3%    | 10.8%   | 8.8%    | 8.8%           |
| Unemployed to not in labor force  | 0.3%    | 0.7%    | 0.1%    | 0.4%    | 0.2%    | 0.2%    | 0.1%    | 0.0%    | 0.2%    | 0.2%    | 0.2%           |
| Not in labor force to employed    | 11.0%   | 16.4%   | 9.5%    | 9.3%    | 11.6%   | 9.3%    | 9.0%    | 6.4%    | 9.5%    | 9.1%    | 10.1%          |
| Not in labor force to unemployed  | 0.1%    | 0.0%    | 0.3%    | 0.5%    | 1.1%    | 0.5%    | 0.1%    | 0.5%    | 0.0%    | 0.0%    | 0.3%           |

<sup>^</sup>State transitions were based on comparison of the states at the ends of the two consecutive years. For example, from the end of 2001 to the end of 2002, 15.1% of normal weight adults became overweight.

\*\*Arithmetic average

**Table S2.** The baseline distributions of body weight status and SES in the US by year of cohort: Medical Expenditure Panel Survey (MEPS) 2001-2010^

|                    | Baseline year of cohorts |       |       |       |       |       |       |       |       |       |
|--------------------|--------------------------|-------|-------|-------|-------|-------|-------|-------|-------|-------|
|                    | 2001                     | 2002  | 2003  | 2004  | 2005  | 2006  | 2007  | 2008  | 2009  | 2010  |
| Normal weight      | 39.0%                    | 38.1% | 37.6% | 38.2% | 36.7% | 36.5% | 34.8% | 34.8% | 33.0% | 33.6% |
| Overweight         | 35.9%                    | 36.2% | 35.5% | 34.8% | 35.1% | 34.9% | 35.1% | 35.1% | 35.7% | 35.1% |
| Obese              | 25.0%                    | 25.7% | 26.9% | 27.0% | 28.1% | 28.6% | 30.1% | 30.1% | 31.2% | 31.3% |
|                    |                          |       |       |       |       |       |       |       |       |       |
| Low income         | 25.3%                    | 24.3% | 26.0% | 28.2% | 27.3% | 27.3% | 27.1% | 27.9% | 30.1% | 30.5% |
| Middle income      | 31.5%                    | 32.3% | 31.5% | 31.4% | 31.4% | 30.9% | 33.4% | 31.5% | 30.8% | 31.7% |
| High income        | 43.2%                    | 43.4% | 42.5% | 40.4% | 41.3% | 41.8% | 39.5% | 40.6% | 39.2% | 37.8% |
|                    |                          |       |       |       |       |       |       |       |       |       |
| Employed           | 82.1%                    | 82.2% | 81.7% | 80.6% | 81.1% | 81.6% | 82.1% | 80.8% | 78.3% | 78.8% |
| Not in labor force | 4.7%                     | 4.6%  | 4.9%  | 5.4%  | 5.2%  | 5.2%  | 5.8%  | 5.0%  | 6.1%  | 6.9%  |
| Unemployed         | 13.2%                    | 13.2% | 13.4% | 13.9% | 13.8% | 13.1% | 12.0% | 14.2% | 15.7% | 14.2% |

^For each year, the results are based on survey measurements at the end of the years

Normal weight, BMI<25; overweight, BMI≥25 and <30; obese, BMI≥30.

Low income, family income <200% federal poverty line (FPL); middle income, family income ≥200% and <400% FPL; high income, family income ≥400% FPL.

**Table S3.** The equations and parameters used for system dynamics model setup

| <b>Logit (Flow rate)</b>             | <b>Parameter/equation</b>                                  | <b>Number of predictors in the equation</b> |
|--------------------------------------|------------------------------------------------------------|---------------------------------------------|
| 1. Normal to overweight              | =-1.7347                                                   | 0                                           |
| 2. Normal to obese                   | =-4.4545                                                   | 0                                           |
| 3. Overweight to normal weight       | =-0.8076 - 3.4816 * Middle income                          | 1                                           |
| 4. Overweight to obese               | =-2.8617 + 4.8315 * Middle income - 1.5165 * Normal weight | 2                                           |
| 5. Obese to normal weight            | =-12.4697 + 31.5337 * Unemployed + 10.6137 * Normal weight | 2                                           |
| 6. Obese to overweight               | =-9.1421 + 8.7471 * Middle income + 12.9377 * Overweight   | 2                                           |
| 7. Employed to unemployed            | =-1.6476 - 7.7052 * Normal weight                          | 1                                           |
| 8. Employed to not in labor force    | =-5.8527                                                   | 0                                           |
| 9. Unemployed to employed            | =-3.4508 + 8.0671 * Unemployed                             | 1                                           |
| 10. Unemployed to not in labor force | =-6.1359                                                   | 0                                           |
| 11. Not in labor force to employed   | =-15.5877 + 37.8222 * Overweight                           | 1                                           |
| 12. Not in labor force to unemployed | =90.3792 -117.9005 * Employed                              | 1                                           |
| 13. Family income low to middle      | =-1.2215                                                   | 0                                           |
| 14. Family income low to high        | =-2.7626                                                   | 0                                           |
| 15. Family income middle to low      | =-1.5634                                                   | 0                                           |
| 16. Family income middle to high     | =-1.1192                                                   | 0                                           |
| 17. Family income high to middle     | =-1.7401                                                   | 0                                           |
| 18. Family income high to low        | =-3.2773                                                   | 0                                           |

\*All the equations were the result of stepwise model selection based on the MEPS data. Flow rates are at logit scale, which were then converted into probability scale in system dynamics model. All the predictors are the prevalence of the SES/weight status in the previous year.

**Figure S1.** The system dynamics between population body weight status and SES (income and employment status): based on the Medical Expenditure Panel Survey (MEPS) 2001-2010 data

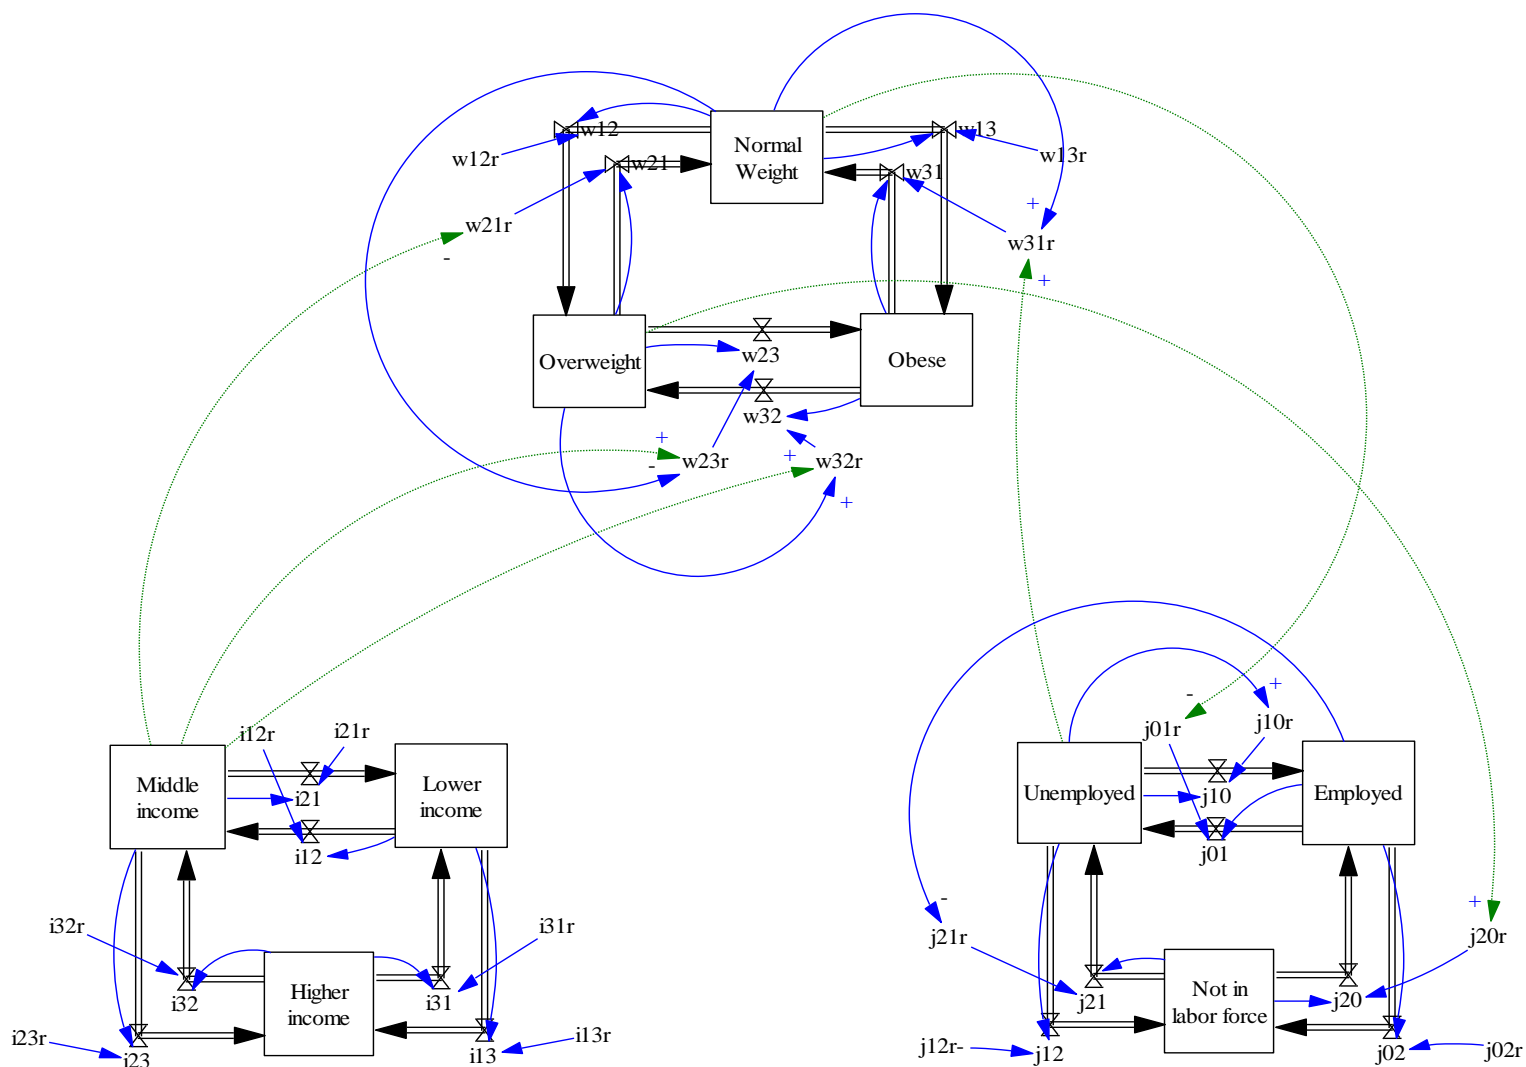

Green dashed arrows: the crosstalk pathways between subsystems, the significant predictors in Table S3 that predict flows in another subsystem. Predictors in Table S3 that predict flows within the same subsystem are shown as blue arrows with a +/- sign.

+: up regulate; -: down regulate

Denotations: prefix *i* for *income* change, *j* for *employment/job* status change, *w* for *weight* status change; suffix *r* for *flow rate*; the numbers denoting the statuses. For example, *w21* denotes the flow overweight (2) returning normal weight (1) state, which is the product of *w21r* and the prevalence of overweight in previous year.

**Figure S2.** Simulated flow of job dynamics: status quo and experiment 2\*

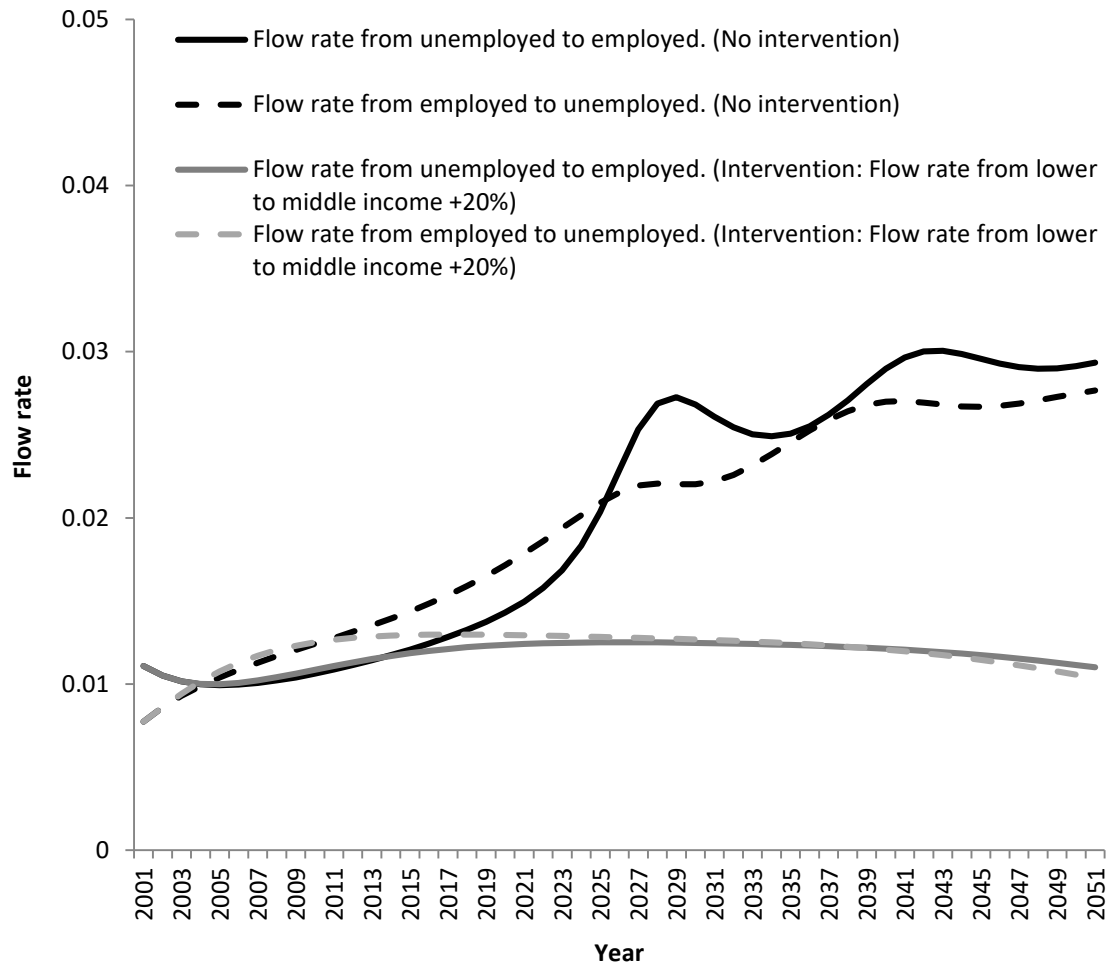

\*Experiment 2: Improving the flow rate from lower to middle income

Figure S3. Comparing simulated and empirical\* prevalence of overweight and obesity

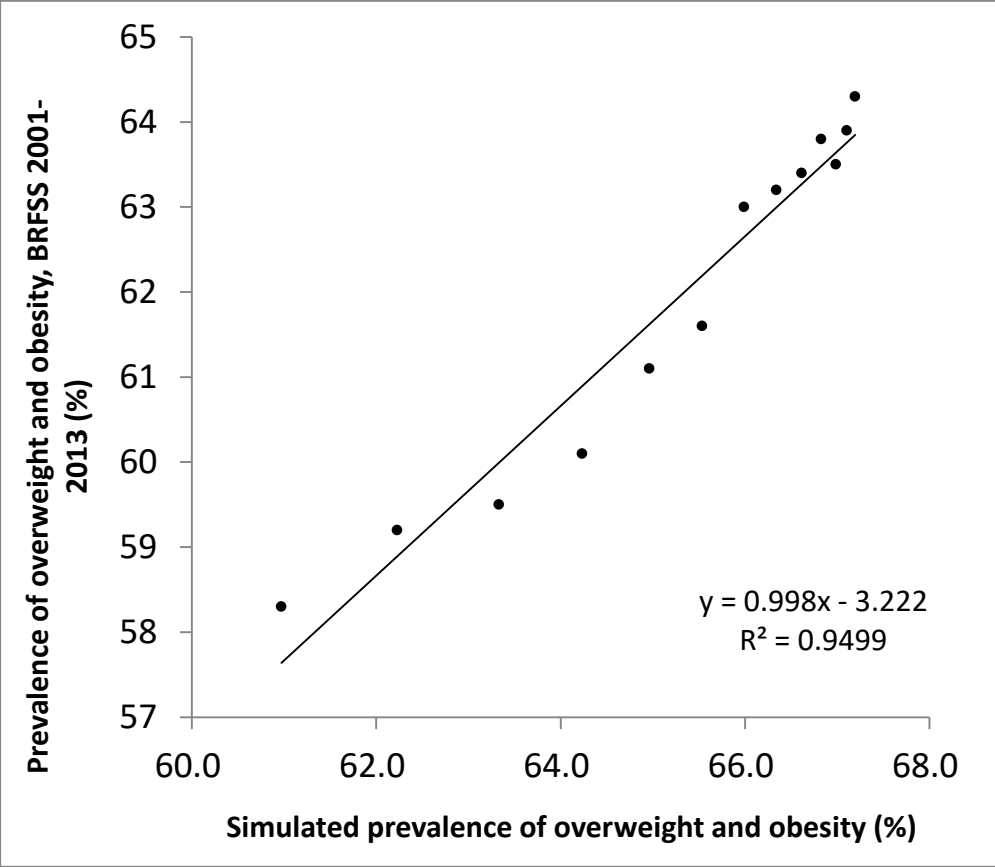

\* Empirical data from the U.S. Behavioral Risk Factor Surveillance Systems, 2001-2013.



Figure S4 Sensitivity simulations of predicted prevalence of overweight and obesity.

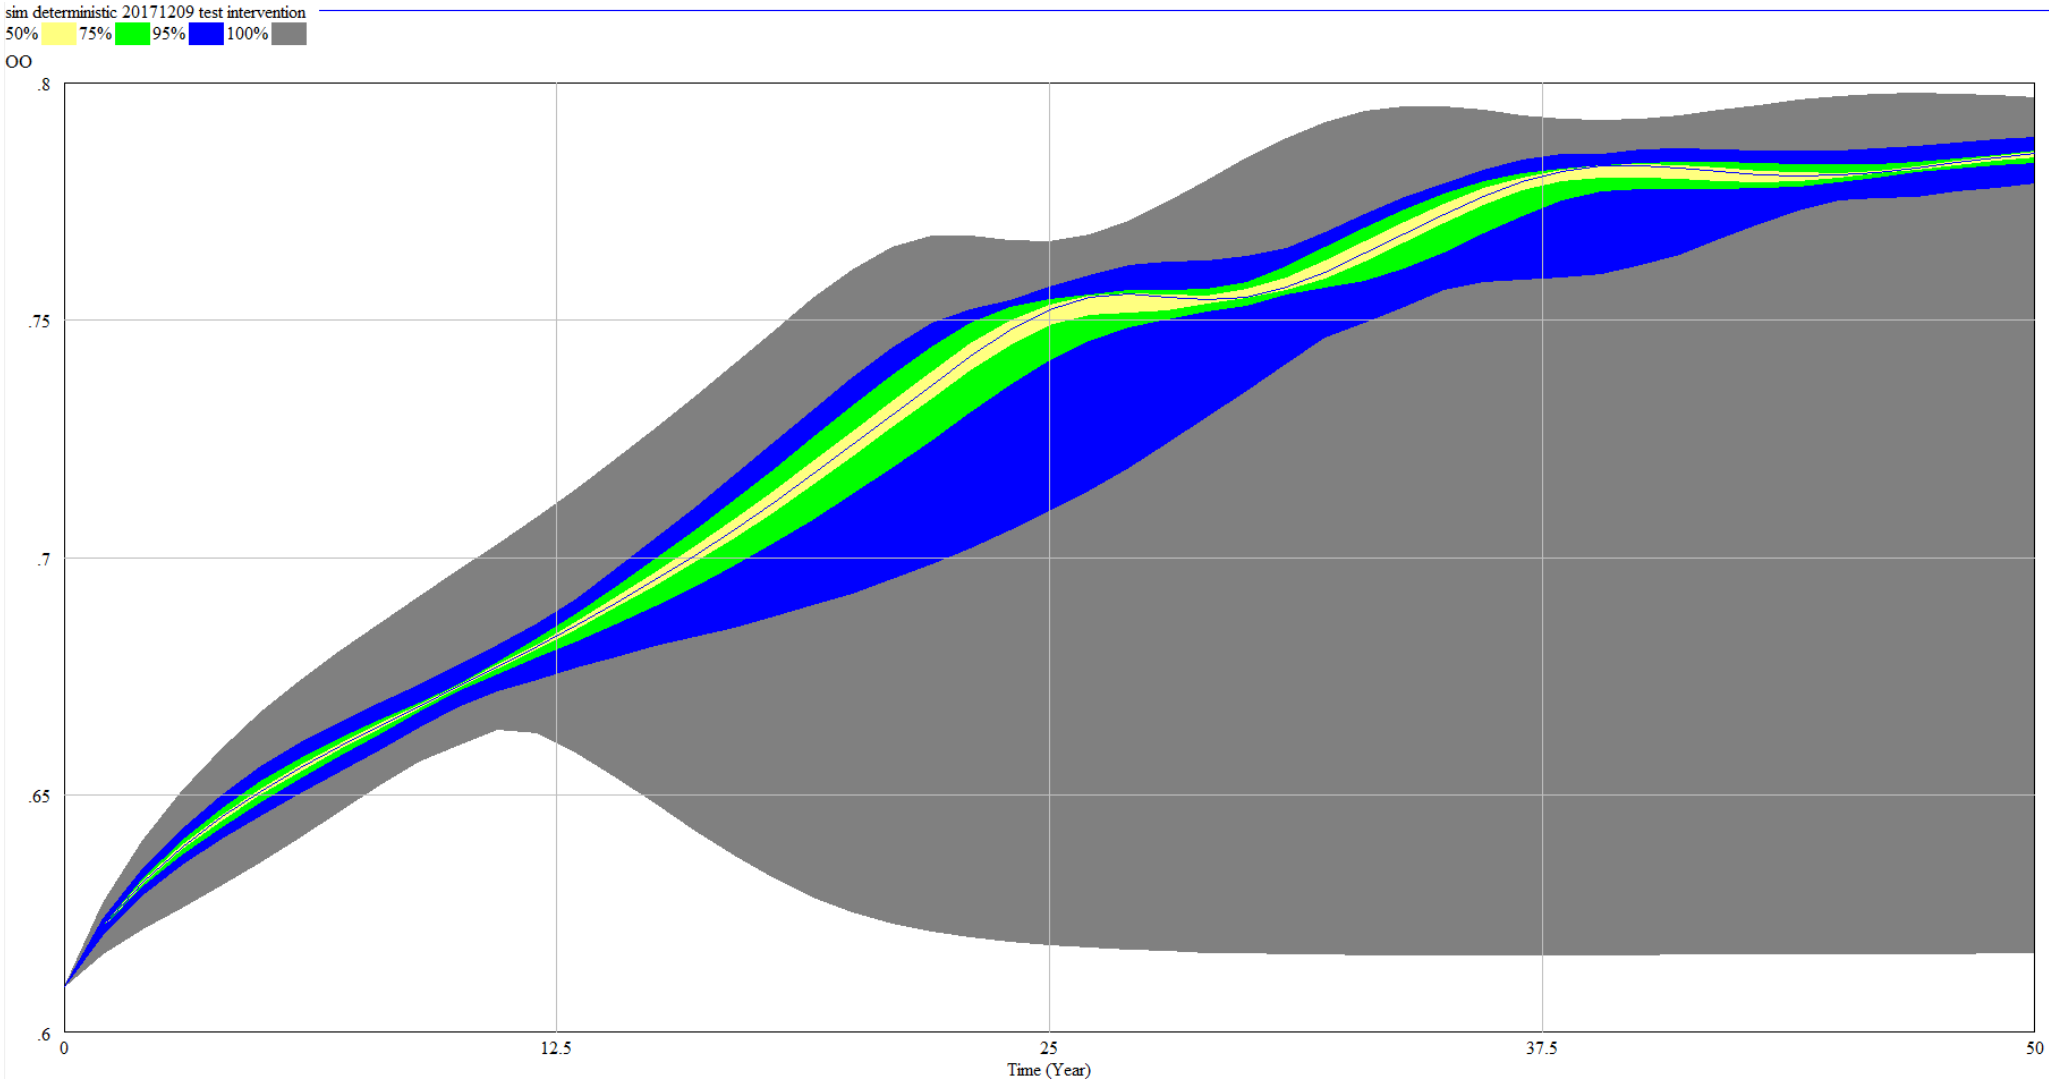

Supplement: NIHMS971500-supplement.pdf [file NIHMS971500-supplement.pdf]
